# Supplementary material for: From pre-COPD to COPD: a Simple, Low cost and easy to IMplement (SLIM) risk calculator
Source: PubMed Central journal article supplement — Eur Respir J. 2023 Sep 28;62(3):2300806. doi: 10.1183/13993003.00806-2023 (PMC10533946; doi:10.1183/13993003.00806-2023), 2023-09-28

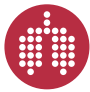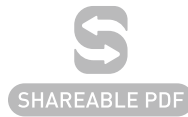

# From pre-COPD to COPD: a Simple, Low cost and easy to IMplement (SLIM) risk calculator

Miguel J. Divo <sup>1</sup>, Congjian Liu<sup>1</sup>, Francesca Polverino <sup>2</sup>, Peter J. Castaldi <sup>3,4</sup>,  
Bartolome R. Celli <sup>1,5</sup> and Yohannes Tesfaigzi <sup>1,5</sup>

<sup>1</sup>Pulmonary and Critical Care Division, Brigham and Women's Hospital, Harvard Medical School, Boston, MA, USA. <sup>2</sup>Pulmonary and Critical Care Medicine, Department of Medicine, Baylor College of Medicine Houston, Houston, TX, USA. <sup>3</sup>Channing Division of Network Medicine, Brigham and Women's Hospital, Harvard Medical School, Boston, MA, USA. <sup>4</sup>General Medicine and Primary Care, Brigham and Women's Hospital, Harvard Medical School, Boston, MA, USA. <sup>5</sup>B.R. Celli and Y. Tesfaigzi are senior authors and contributed equally to this study and manuscript.

Corresponding author: Miguel J. Divo ([mdivo@bwh.harvard.edu](mailto:mdivo@bwh.harvard.edu))

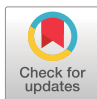

Shareable abstract (@ERSpublications)

**In middle-aged ever-smokers, a simple predictive model, with FEV<sub>1</sub>/FVC, smoking history, BMI and chronic bronchitis, helps identify subjects at high risk of developing chronic airflow limitation**  
<https://bit.ly/45mwLx3>

**Cite this article as:** Divo MJ, Liu C, Polverino F, *et al.* From pre-COPD to COPD: a Simple, Low cost and easy to IMplement (SLIM) risk calculator. *Eur Respir J* 2023; 62: 2300806 [DOI: 10.1183/13993003.00806-2023].

This extracted version can be shared freely online.

Copyright ©The authors 2023.

This version is distributed under the terms of the Creative Commons Attribution Non-Commercial Licence 4.0. For commercial reproduction rights and permissions contact [permissions@ersnet.org](mailto:permissions@ersnet.org)

This article has an editorial commentary:  
<https://doi.org/10.1183/13993003.01470-2023>

Received: 13 May 2023  
Accepted: 9 Aug 2023

## Abstract

**Background** The lifetime risk of developing clinical COPD among smokers ranges from 13% to 22%. Identifying at-risk individuals who will develop overt disease in a reasonable timeframe may allow for early intervention. We hypothesised that readily available clinical and physiological variables could help identify ever-smokers at higher risk of developing chronic airflow limitation (CAL).

**Methods** Among 2273 Lovelace Smokers' Cohort (LSC) participants, we included 677 (mean age 54 years) with normal spirometry at baseline and a minimum of three spirometries, each 1 year apart. Repeated spirometric measurements were used to determine incident CAL. Using logistic regression, demographics, anthropometrics, smoking history, modified Medical Research Council dyspnoea scale, St George's Respiratory Questionnaire, comorbidities and spirometry, we related variables obtained at baseline to incident CAL as defined by the Global Initiative for Chronic Obstructive Lung Disease and lower limit of normal criteria. The predictive model derived from the LSC was validated in subjects from the COPDGene study.

**Results** Over 6.3 years, the incidence of CAL was 26 cases per 1000 person-years. The strongest independent predictors were forced expiratory volume in 1 s (FEV<sub>1</sub>)/forced vital capacity (FVC) <0.75, having smoked ≥30 pack-years, body mass index (BMI) ≤25 kg·m<sup>-2</sup> and symptoms of chronic bronchitis. Having all four predictors increased the risk of developing CAL over 6 years to 85% (area under the receiver operating characteristic curve (AUC ROC) 0.84, 95% CI 0.81–0.89). The prediction model showed similar results when applied to subjects in the COPDGene study with a follow-up period of 10 years (AUC ROC 0.77, 95% CI 0.72–0.81).

**Conclusion** In middle-aged ever-smokers, a simple predictive model with FEV<sub>1</sub>/FVC, smoking history, BMI and chronic bronchitis helps identify subjects at high risk of developing CAL.

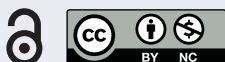

Supplement: ERJ-00806-2023.Shareable.pdf [file ERJ-00806-2023.Shareable.pdf]
