# Supplementary material for: From pre-COPD to COPD: a Simple, Low cost and easy to IMplement (SLIM) risk calculator
Source: PubMed Central journal article supplement — Eur Respir J. 2023 Sep 28;62(3):2300806. doi: 10.1183/13993003.00806-2023 (PMC10533946; doi:10.1183/13993003.00806-2023), 2023-09-28
Supplement: ERJ-00806-2023.Supplement.pdf [file ERJ-00806-2023.Supplement.pdf]

## Supplemental Material

From Pre-COPD to COPD: a Simple, Low cost, and ease of IMplementation (SLIM) risk calculator  
Miguel J. Divo MD MPH, Congjian Liu PhD, Francesca Polverino MD PhD, Peter J. Castaldi MD,  
Bartolome R. Celli MD and Yohannes Tesfaigzi PhD

### Content:

#### A. Figures:

1. Figure E1. Flow diagram showing the selection process for participants of the COPDGene® (validation cohort), meeting the inclusion criteria for the current analysis.
2. Figure E2. Flow diagram showing the selection process for participants in the LSC meeting the inclusion criteria.
3. Figure E3. Scatterplot of the baseline FEV<sub>1</sub>/FVC ratio vs. FEV<sub>1</sub> % predicted.
4. Figure E4. Proposed Algorithm to apply our model as a recruitment tool in research studies examining incident CAL.

#### B. Tables:

1. Table E1. Spirometric classification criteria
  - A. Spirometric classification criteria based on the Global Initiative for Chronic Obstructive Lung Disease (GOLD) 2023 guidelines and Preserved Ratio Impaired Spirometry (PRISm).
  - B. Spirometric classification criteria based on the Lower Limit of normal values
2. Table E2. Visual representation of the possible spirometric trajectories leading to all possible outcomes.
3. Table E3. Comparison of baseline characteristics between subjects with incident CAL and those who maintained normal lung function at the end of the observation period in the COPDGene cohort.
4. Table E4. Results from LASSO variable selection methods for the prediction of incident CAO

#### C. Prediction formula, graphic profiler, and contribution index table for predicting incident CAL in the LSC with continuous variables.

#### D. Prediction formula and contribution index table for predicting incident CAL in the LSC with dichotomic variables excluding FEV<sub>1</sub> between 80-100 % predicted (parsimonious model).

#### E. Analysis using spirometric classification by the Lower Limit of Normal (LLN).

#### F. Longitudinal changes in lung function, smoking status, BMI, and symptoms.

#### G. TRIPOD checklist

**Figure E1.** Flow diagram showing the selection process for participants of the COPDGene® (validation cohort), meeting the inclusion criteria for the current analysis.

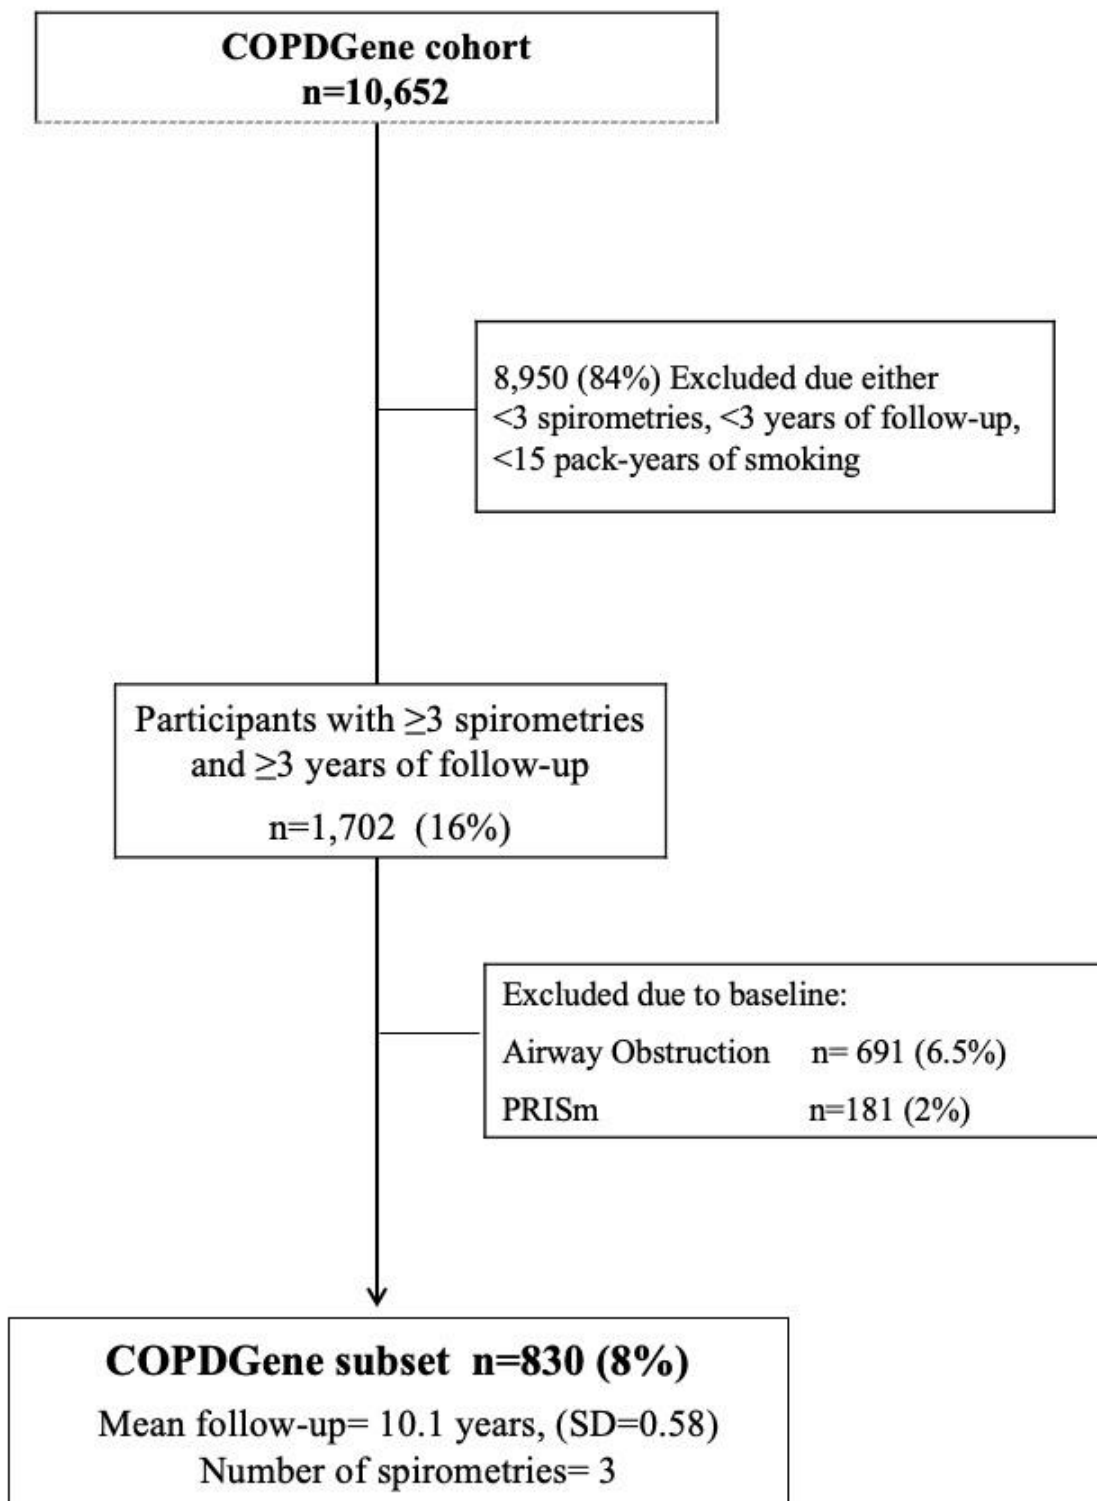

**Figure E2.** Flow diagram showing the selection process for participants in the Lovelace Smoker Cohort (LSC) meeting the inclusion criteria for the current analysis. Spirometric classification for normal, airway obstruction, and PRISm are based on criteria listed in Table E1-A.

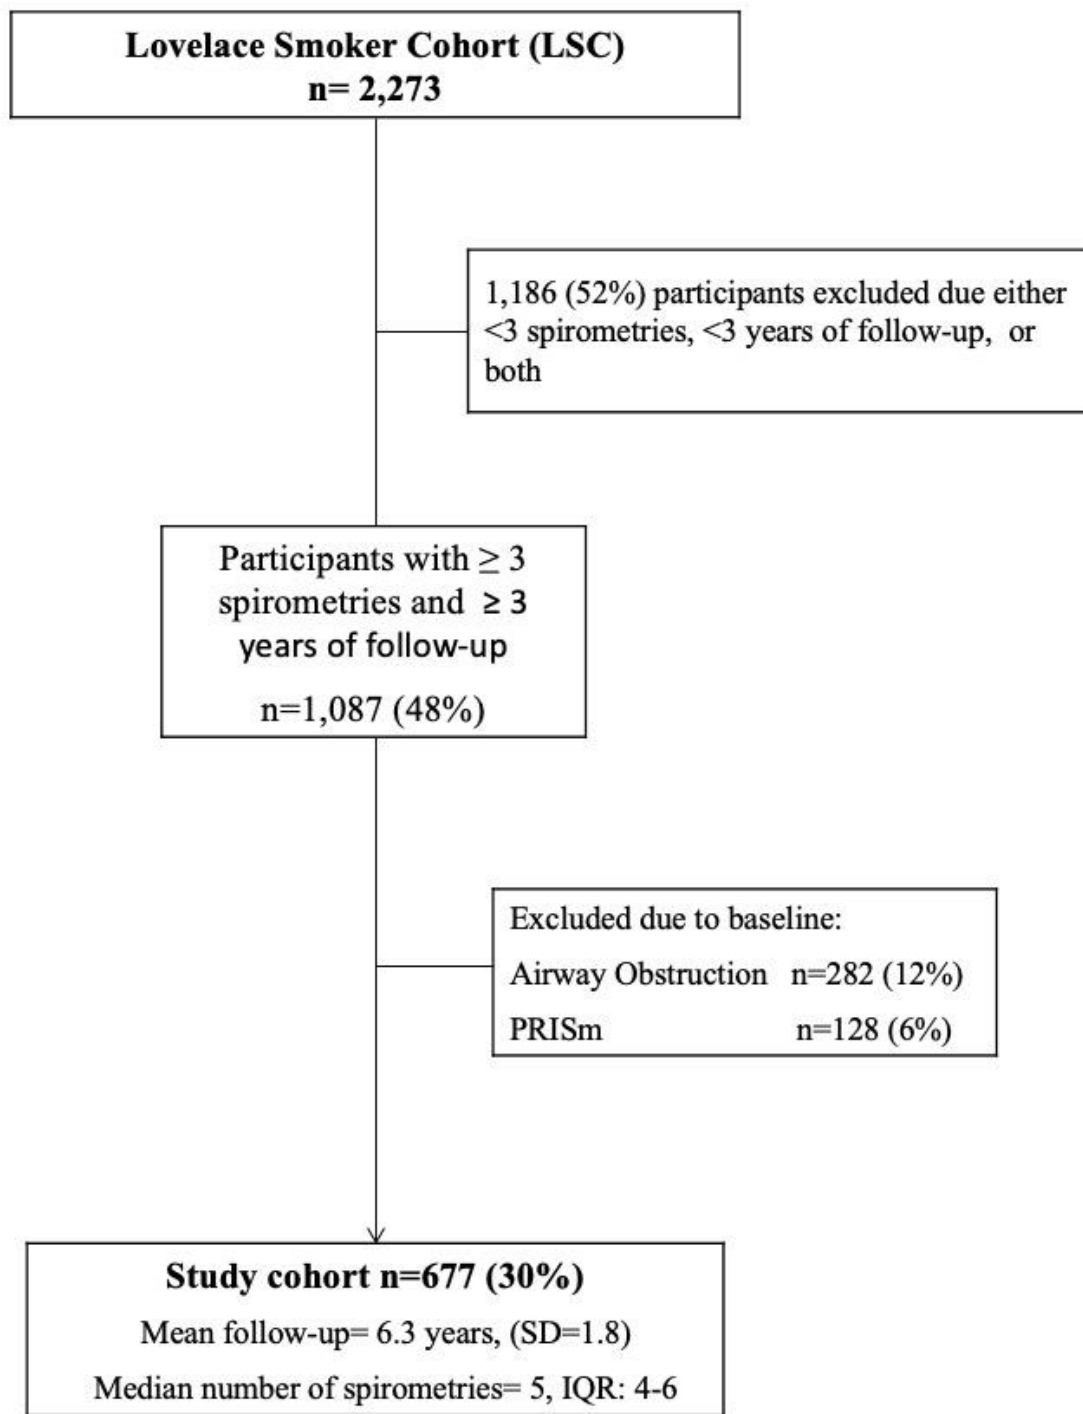

Figure E3. Scatterplot of the baseline FEV<sub>1</sub>/FVC ratio vs. FEV<sub>1</sub> % predicted (GOLD classification) of the 677 subjects from the LSC study with normal baseline spirometry. The red dots represent the 110 participants who developed CAO at the end of the observation period.

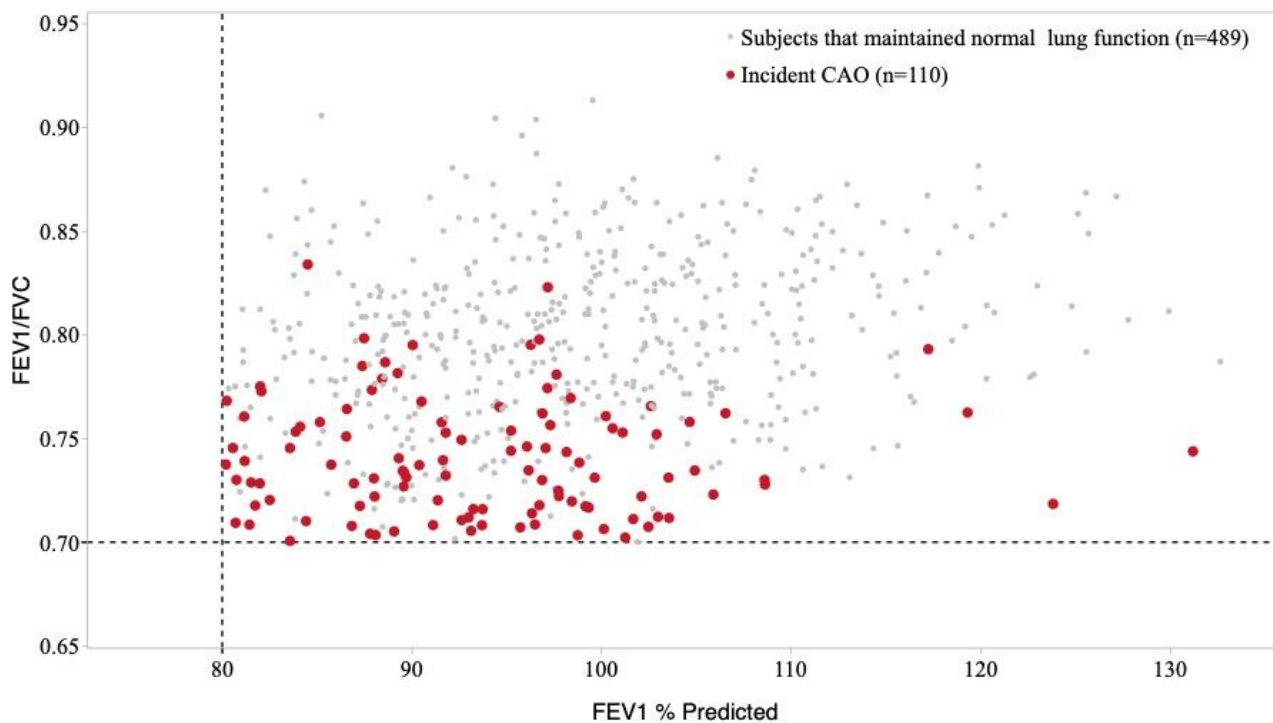

**Figure E4.** Proposed Algorithm to apply our model as a recruitment tool in research studies examining incident CAL.

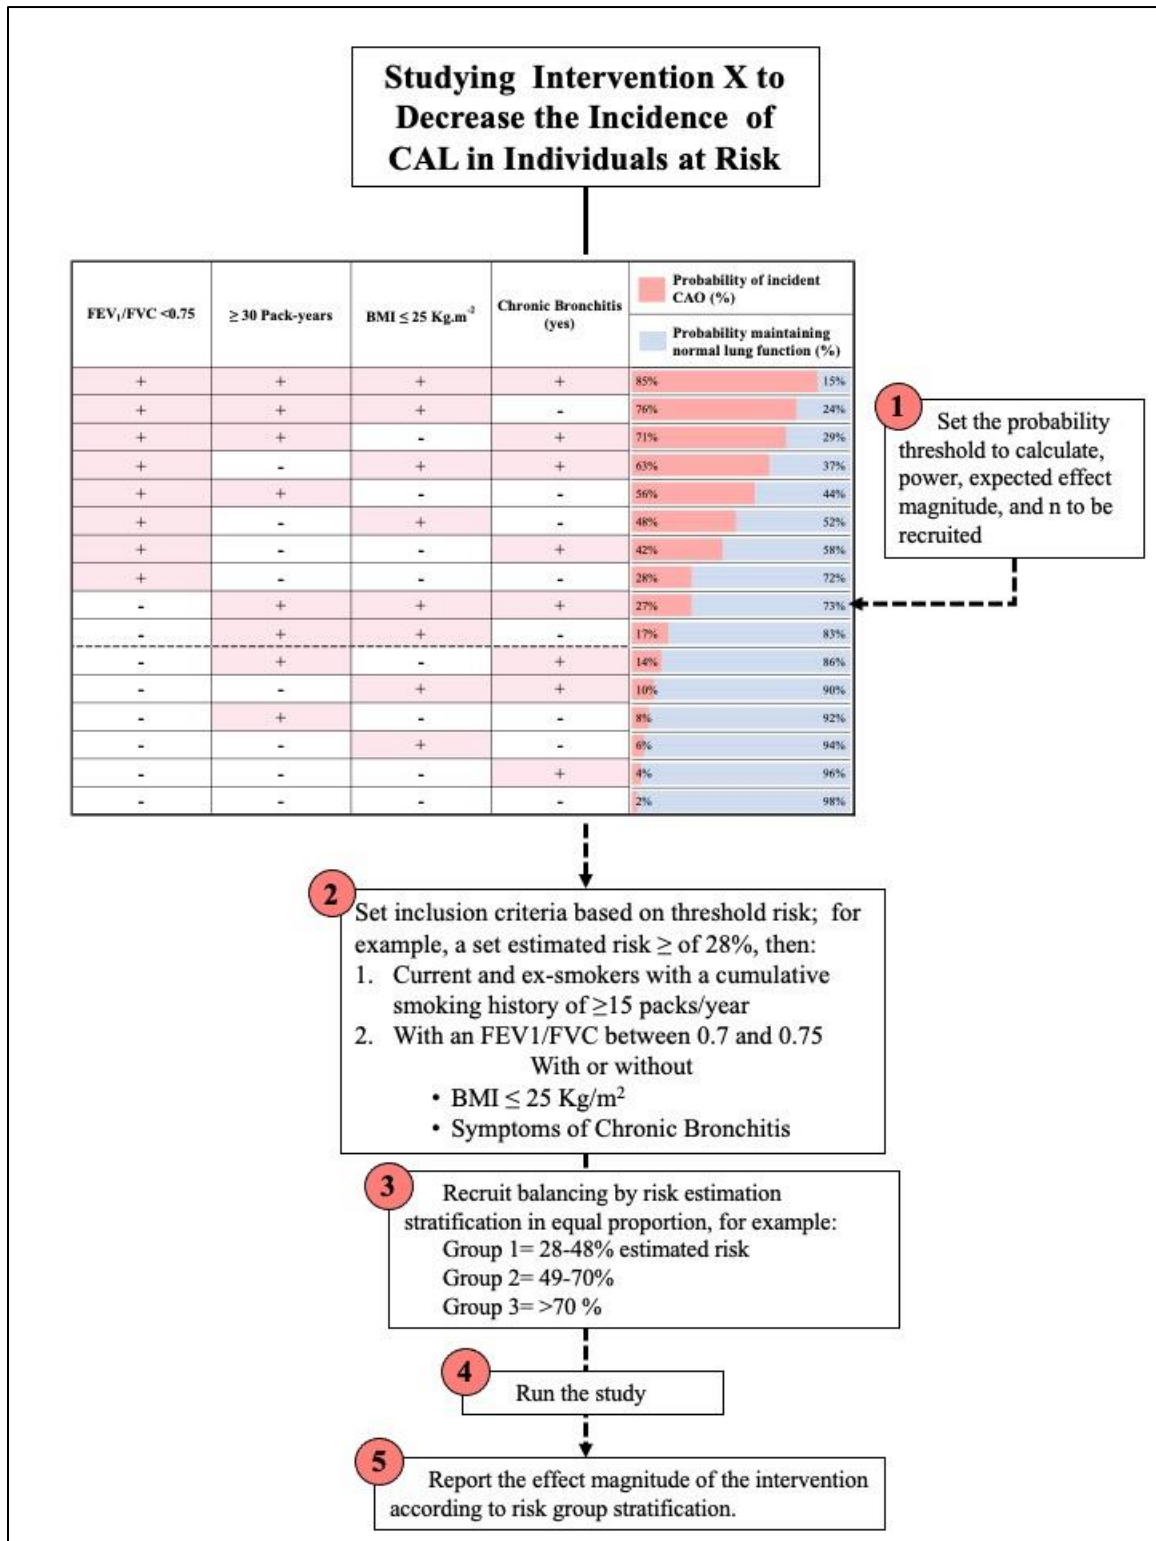

**Table E1.** Spirometric classification criteria.

A. Based on the Global Initiative for Chronic Obstructive Lung Disease (GOLD) 2023 guidelines(1), and Preserved Ratio Impaired Spirometry (PRISm)(2) .

|                                                       | Normal spirometry | GOLD 1 | GOLD 2  | GOLD 3 | GOLD 4 | PRISm |
|-------------------------------------------------------|-------------------|--------|---------|--------|--------|-------|
| Postbronchodilator FEV <sub>1</sub> /FVC              | ≥0.70             | <0.70  | <0.70   | <0.70  | <0.70  | ≥0.70 |
| Postbronchodilator FEV <sub>1</sub> percent predicted | ≥80 %             | ≥80 %  | 50-79 % | 30-49% | <30 %  | <80 % |

B. Based on the Lower Limit of normal (LLN)

|                                                       | Normal spirometry | CAL  | PRISm |
|-------------------------------------------------------|-------------------|------|-------|
| Postbronchodilator FEV <sub>1</sub> /FVC              | ≥LLN              | <LLN | ≥LLN  |
| Postbronchodilator FEV <sub>1</sub> percent predicted | ≥LLN              |      | <LLN  |

**Table E2.** Visual representation of the possible spirometric trajectories leading to the four possible outcomes. Each individual spirometry classification is based on the criteria displayed in Table E1.

|   | Baseline spirometry | Follow-up spirometry 1* | Follow-up spirometry n* | Outcome classification    |
|---|---------------------|-------------------------|-------------------------|---------------------------|
| 1 | N                   | N                       | N                       | <b>(preserved) Normal</b> |
| 2 | N                   | O                       | O                       | <b>Incident CAL</b>       |
| 2 | N                   | N                       | O                       | <b>Incident CAO L</b>     |
| 3 | N                   | P                       | P                       | <b>Incident PRISm</b>     |
| 3 | N                   | N                       | P                       | <b>Incident PRISm</b>     |
| 4 | N                   | O                       | N                       | <b>Unstable</b>           |
| 4 | N                   | P                       | N                       | <b>Unstable</b>           |
| 4 | N                   | P                       | O                       | <b>Unstable</b>           |

\*For the Lovelace Smokers Cohort follow-up spirometry occurred at 18-months interval, in the COPDGene at 5-year interval.

Abbreviations: N= Normal spirometry, O= obstructive pattern, P= PRISm

**Table E3.** Comparison of baseline characteristics between subjects with incident CAL and those who maintained normal lung function at the end of the observation period in the COPDGene Cohort.

| Characteristics                        | Incident CAO | Subject who remained in the normal lung function range | p-value |
|----------------------------------------|--------------|--------------------------------------------------------|---------|
|                                        | 146          | 684                                                    |         |
| • Demographic and anthropometric data  |              |                                                        |         |
| Age (years)                            | 59 (9)       | 57 (8)                                                 | 0.0174  |
| Female sex (%)                         | 68 (47%)     | 367 (54%)                                              | 0.1200  |
| AA (%)                                 | 50 (34%)     | 22 (33%)                                               | 0.6756  |
| BMI (Kg/m <sup>2</sup> )               | 27.6 (5.5)   | 29.3 (5.6)                                             | 0.0013  |
| Height (cm)                            | 170 (9.5)    | 170 (9.2)                                              | 0.5514  |
| Follow-up. mean (years)                | 10.2 (0.59)  | 10.08 (0.58)                                           | 0.0827  |
| Number of spirometries (median, IQR)   | 3(3-3)       | 3(3-3)                                                 |         |
| • Exposure                             |              |                                                        |         |
| Age of smoking initiation (years)      | 17 (5)       | 17 (5)                                                 | 0.8354  |
| Current smoking (%)                    | 78 (53%)     | 325 (48%)                                              | 0.1946  |
| Age of quitting smoking (years)*       | 51 (11)      | 47 (10)                                                | 0.0050  |
| Pack-years of smoking                  | 44 (25)      | 37 (18)                                                | 0.0010  |
| • Lung function                        |              |                                                        |         |
| FEV <sub>1</sub> /FVC                  | 0.75 (0.04)  | 0.79 (0.05)                                            | <0.0001 |
| FEV <sub>1</sub> (L)                   | 2.77 (0.68)  | 2.9 (0.67)                                             | 0.0361  |
| FEV <sub>1</sub> % Predicted           | 94 (10)      | 98 (11)                                                | <0.0001 |
| FVC (L)                                | 3.73 (0.96)  | 3.66 (0.87)                                            | 0.4384  |
| FVC % Predicted                        | 98 (11)      | 97 (11)                                                | 0.1784  |
| • Symptoms                             |              |                                                        |         |
| mMRC score†                            | 0.86 (1.23)  | 0.66 (1.08)                                            | 0.0719  |
| SGRQ total                             | 19 (19)      | 14 (16)                                                | 0.0069  |
| Chronic bronchitis (%)                 | 28 (19%)     | 69 (10%)                                               | 0.0019  |
| • Comorbidities                        |              |                                                        |         |
| History of asthma (%)                  | 27 (19%)     | 75 (11%)                                               | 0.2747  |
| Told of having a diagnosis of COPD (%) | 22 (15%)     | 36 (5%)                                                | 0.8727  |



\* Applies to those who quit smoking at baseline evaluation.

Abbreviations: AA= African American, BMI= Body Mass Index, IQR= interquartile range, mMRC= modified Medical Research Council dyspnoea scale, SGRQ= St. Georges Respiratory Questionnaire

**Table E4.** Results from LASSO variable selection methods for the prediction of incident CAL.

A. Variables selected with continuous variables left intact.

Selected Lambda=0.00933, Mean deviance= 0.5999

| <b>Explanatory variable</b>     |
|---------------------------------|
| 1. FEV <sub>1</sub> /FVC ratio  |
| 2. Pack-years of smoking        |
| 3. BMI (Kg/m <sup>2</sup> )     |
| 4. FEV <sub>1</sub> % predicted |
| 5. Age (years)                  |
| 6. History of COPD              |
| 7. Chronic bronchitis (yes)     |
| 8. High School education (yes)  |

B. Variables selected with continuous variables dichotomized (see methods section). Selected

Lambda=0.00997, Mean deviance= 0.6874

| <b>Explanatory variable</b>                    |
|------------------------------------------------|
| 1. FEV <sub>1</sub> /FVC ratio $\leq 0.75$     |
| 2. Pack-years of smoking $\geq 30$             |
| 3. BMI $\leq 25$ (Kg/m <sup>2</sup> )          |
| 4. FEV <sub>1</sub> between 80-100 % predicted |
| 5. Age $\geq 55$ years                         |
| 6. History of COPD                             |
| 7. Chronic bronchitis                          |
| 8. FVC $\leq 95$ % predicted                   |
| 9. History of asthma                           |
| 10. High School education                      |

Abbreviation: BMI= Body Mass Index.

**Section C. Result from the Logistic regression analysis for predicting incident CAL in the LSC with continuous variables.**

**1. Prediction formula**

The following prediction formula results from the logistic regression analysis aimed to predict incident CAL in the LSC. The formula includes all significant predictors and correspondent coefficients needed to calculate in smokers the six-years probability of incident CAL.

$$\text{Probability for incident CAO} = \frac{1}{1 + e^{(-Y)}}$$

Where Y:

$$Y = 34.09 + (-42.59) * (\text{FEV}_1/\text{FVC}) + (-0.11) * (\text{BMI}) + 0.05 * (\text{Age}) + (-0.03) * (\text{FEV}_1 \% \text{ predicted}) + 0.84 * (\text{Chronic bronchitis, Yes=1, No=0})$$

**2. Graphic profiler**

The profiler is the graphic representation of the weight each predictor contributes across their value range in predicting the probability of incident CAL. As an example, for a 55 years-old individual with an FEV1/FVC=0.73, BMI of 25 Kg.m<sup>-2</sup>, who has chronic bronchitis and FEV<sub>1</sub> % predicted 90% (red dotted lines in each corresponding panel), the probability estimates for developing CAL at 6 years is 74% (left 2 columns, where first column represent group membership where 1= incident CAO 0= maintaining normal spirometry, and the 2<sup>nd</sup> column shows the calculated probability based on the parameters input).

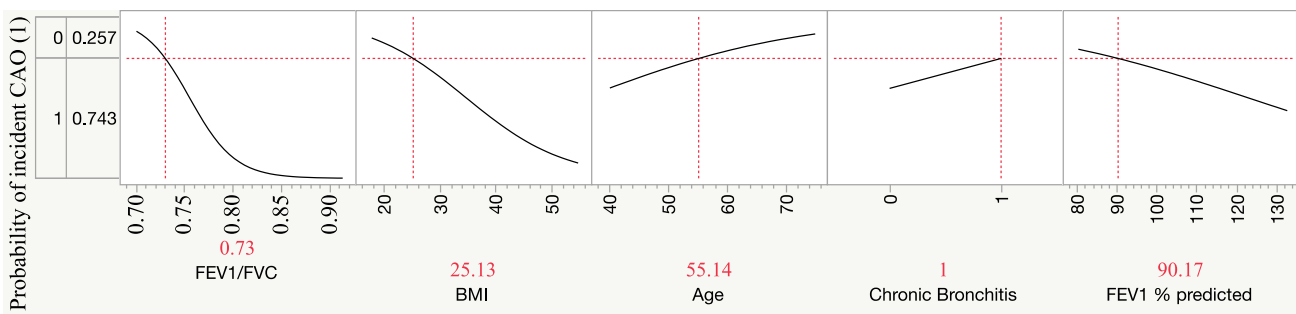

**3. Contribution index table.**

The following table describes the contribution index of each parameter in predicting incident CAL in the derivation model derived from the logistic regression model.

| Predictor                    | Weight (total contribution to the Variance) |
|------------------------------|---------------------------------------------|
| FEV <sub>1</sub> /FVC        | 0.81                                        |
| BMI                          | 0.31                                        |
| Age                          | 0.07                                        |
| FEV <sub>1</sub> % predicted | 0.05                                        |
| Chronic Bronchitis           | 0.05                                        |

**Section D. Prediction formula and contribution index table for the prediction of incident CAL in the LSC with dichotomic variables excluding FEV<sub>1</sub> between 80-100 % predicted (parsimonious model).**

**1. Prediction formula**

The following prediction formula is the result of the logistic regression analysis aimed to predict incident CAL in the LSC. The formula includes all significant predictors and correspondent coefficients needed to calculate in smokers the six-years probability of incident CAL.

$$\text{Probability for incident CAO} = \frac{1}{1 + e^{(-Y)}}$$

Where **Y**:

$$Y = -3.6949 + 2.7294 * (0.70 < \text{FEV}_1/\text{FVC} \leq 0.75, \text{Yes} = 1, \text{No} = 0) + 1.2189 * (\geq 30\text{pack} - \text{years}, \text{Yes} = 1, \text{No} = 0) + 0.8762 * (\text{BMI} \leq 25\text{Kg}/\text{m}^2, \text{Yes} = 1, \text{No} = 0) + 0.6275 * (\text{Chronic bronchitis}, \text{Yes} = 1, \text{No} = 0)$$

**2. Contribution index table.**

The following table describes the contribution index of each parameter in predicting incident CAO in the derivation model derived from the logistic regression model.

| Predictor             | Weight (total contribution to the Variance) |
|-----------------------|---------------------------------------------|
| FEV <sub>1</sub> /FVC | 0.81                                        |
| Pack-years            | 0.15                                        |
| BMI                   | 0.07                                        |
| Chronic Bronchitis    | 0.04                                        |

### **Section E. Analysis using spirometric classification by the Lower Limit of Normal (LLN)**

Using the post-BD  $FEV_1/FVC < LLN$  to define CAL, among the 1,085 subjects meeting the inclusion criteria, 761 had normal baseline spirometry, 221 were classified as obstructed, and 102 as PRISm. The baseline characteristics between subjects with incident CAL and those who maintained normal lung function based on LLN are presented below in Table E4.

**Table E4.** Baseline characteristics comparing subjects with incident CAL and those who maintained normal lung function based on LLN classification criteria.

| Characteristics                              | Incident CAL<br>by LLN | Subject who remained with preserved<br>lung function by LLN | p-value |
|----------------------------------------------|------------------------|-------------------------------------------------------------|---------|
|                                              | 102                    | 616                                                         |         |
| <b>▪ Demographic and anthropometric data</b> |                        |                                                             |         |
| Age (years)                                  | 58 ± 2                 | 54 ± 8                                                      | 0.0006  |
| Female sex (%)                               | 82 (80%)               | 506 (82%)                                                   | 0.6777  |
| Hispanic (%)                                 | 16 (16%)               | 113 (18%)                                                   | 0.5794  |
| BMI (Kg/m <sup>2</sup> )                     | 26.5 ± 5.1             | 28.6 ± 5.7                                                  | 0.0002  |
| Height (cm)                                  | 165.2 ± 8.9            | 165.2 ± 8.6                                                 | 0.9728  |
| <b>▪ Exposure</b>                            |                        |                                                             |         |
| Age of quitting smoking<br>(years)*          | (n=50) 51 ± 9          | (n=307) 46 ± 9                                              | 0.0003  |
| Current smoking (%)                          | 54 (53 %)              | 303 (49%)                                                   | 0.5218  |
| Pack-years of smoking                        | 41 ± 19                | 35 ± 18                                                     | 0.0060  |
| <b>▪ Lung function</b>                       |                        |                                                             |         |
| FEV <sub>1</sub> /FVC                        | 0.72 ± 0.04            | 0.79 ± 0.05                                                 | <0.0001 |
| FEV <sub>1</sub> (L)                         | 2.55 ± 0.66            | 2.78 ± 0.63                                                 | 0.0010  |
| FEV <sub>1</sub> % Predicted                 | 118 ± 11               | 126 ± 15                                                    | <0.0001 |
| FVC (L)                                      | 3.52 ± 0.91            | 3.52 ± 0.80                                                 | 0.9711  |
| FVC % Predicted                              | 124 ± 12               | 122 ± 14                                                    | 0.1521  |
| <b>▪ Symptoms</b>                            |                        |                                                             |         |
| mMRC score†                                  | 1.22 ± 1.22            | 1.01 ± 1.21                                                 | 0.4254  |
| SGRQ total                                   | 17.7 ± 15.2            | 15.8 ± 14.5                                                 | 0.2352  |
| Chronic bronchitis (%)                       | 36%                    | 24%                                                         | 0.0097  |
| <b>▪ Comorbidities</b>                       |                        |                                                             |         |
| History of asthma (%)                        | 21%                    | 13%                                                         | 0.0461  |
| Diagnosis of COPD given<br>(%)               | 12%                    | 3.74%                                                       | 0.0018  |

\* Applies to those who quit smoking at baseline evaluation.

† Baseline data missing in 19 subjects with incident CAO and 122 subjects who remained within normal lung function range.

Abbreviations: BMI= Body Mass Index, IQR= interquartile range, mMRC= modified Medical Research Council dyspnea scale, SGRQ= St. Georges Respiratory Questionnaire

Six variables were significantly associated with incident CAL: BMI, the FEV<sub>1</sub>/FVC, age and cumulative smoking (pack-years), history of asthma, and the FEV<sub>1</sub> % of LLN. Multivariate analysis showed that an FEV<sub>1</sub>/FVC<0.75, a BMI < 25 Kg.m<sup>-2</sup>, an asthma history, and > 30 pack-years of smoking were the best predictors for incident CAL (**Table E5**). The area under the ROC was 0.83 (95% CI, 0.79-0.86), and the generalized R<sup>2</sup> was 0.33. With the optimal probability threshold estimated at ≥17%, the sensitivity is 0.79, the specificity of 0.80; the Positive Predicted Value is 0.40, the Negative Predicted Value of 0.96, and a misclassification rate of 0.20.

**Table E5.** Predictors for the incidence of chronic airway obstruction (CAL). The model was built using the spirometric reclassification based on the Lower Limit of Normal (LLN).

| <b>Risk factors</b>                 | <b>OR</b> | <b>(95% CI)</b> | <b>p-value</b> |
|-------------------------------------|-----------|-----------------|----------------|
| <b>FEV<sub>1</sub>/FVC &lt;0.75</b> | 13.65     | 7.87-23.65      | <0.0001        |
| <b>BMI ≤ 25 Kg.m<sup>-2</sup></b>   | 2.19      | 1.32-3.61       | 0.0023         |
| <b>History of Asthma (yes)</b>      | 2.17      | 1.15-4.07       | 0.0161         |
| <b>≥ 30 Pack-years</b>              | 2.02      | 1.21-3.38       | 0.0073         |
| <b>Current smoker(yes)</b>          | 1.79      | 1.08-2.98       | 0.0245         |



## **Section F. Longitudinal changes in lung function, smoking status, BMI, and symptoms.**

Over the 6.3 years of observation, subjects with incident CAO lost a mean (SD) FEV<sub>1</sub> of 31 ± 48 ml·year<sup>-1</sup> compared to 10 ± 37 ml·year<sup>-1</sup> in subjects who remained under the normal spirometry category (p<0.0001). For the FVC, we observed a mean *increase* in 28 ± 47 ml·year<sup>-1</sup> and 2 ± 47 ml·year<sup>-1</sup> (p<0.0001), respectively. The SGRQ total score worsened by 15 points (95% CI, 12-17) in the CAO incident group, compared to only 4 points (95% CI, 3-5) (p=0.0001) in subjects remaining in the normal lung function range. The mMRC dyspnoea score difference noted at baseline (**Table 2**) was maintained throughout the observation period, and the proportion of tobacco quitters and relapses was similar in both groups.

## G. TRIPOD checklist

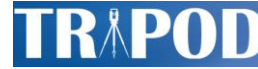

### TRIPOD Checklist: Prediction Model Development

| Section/Topic                | Item | Checklist Item                                                                                                                                                                                        | Page     |
|------------------------------|------|-------------------------------------------------------------------------------------------------------------------------------------------------------------------------------------------------------|----------|
| <b>Title and abstract</b>    |      |                                                                                                                                                                                                       |          |
| Title                        | 1    | Identify the study as developing and/or validating a multivariable prediction model, the target population, and the outcome to be predicted.                                                          | 1        |
| Abstract                     | 2    | Provide a summary of objectives, study design, setting, participants, sample size, predictors, outcome, statistical analysis, results, and conclusions.                                               | 4-5      |
| <b>Introduction</b>          |      |                                                                                                                                                                                                       |          |
| Background and objectives    | 3a   | Explain the medical context (including whether diagnostic or prognostic) and rationale for developing or validating the multivariable prediction model, including references to existing models.      | 6        |
|                              | 3b   | Specify the objectives, including whether the study describes the development or validation of the model or both.                                                                                     | 7        |
| <b>Methods</b>               |      |                                                                                                                                                                                                       |          |
| Source of data               | 4a   | Describe the study design or source of data (e.g., randomized trial, cohort, or registry data), separately for the development and validation data sets, if applicable.                               | 7 & 9    |
|                              | 4b   | Specify the key study dates, including start of accrual; end of accrual; and, if applicable, end of follow-up.                                                                                        | 7        |
| Participants                 | 5a   | Specify key elements of the study setting (e.g., primary care, secondary care, general population) including number and location of centres.                                                          | 7        |
|                              | 5b   | Describe eligibility criteria for participants.                                                                                                                                                       | 7        |
|                              | 5c   | Give details of treatments received, if relevant.                                                                                                                                                     |          |
| Outcome                      | 6a   | Clearly define the outcome that is predicted by the prediction model, including how and when assessed.                                                                                                | 8        |
|                              | 6b   | Report any actions to blind assessment of the outcome to be predicted.                                                                                                                                |          |
| Predictors                   | 7a   | Clearly define all predictors used in developing or validating the multivariable prediction model, including how and when they were measured.                                                         | 9        |
|                              | 7b   | Report any actions to blind assessment of predictors for the outcome and other predictors.                                                                                                            |          |
| Sample size                  | 8    | Explain how the study size was arrived at.                                                                                                                                                            | 9        |
| Missing data                 | 9    | Describe how missing data were handled (e.g., complete-case analysis, single imputation, multiple imputation) with details of any imputation method.                                                  | 11       |
| Statistical analysis methods | 10a  | Describe how predictors were handled in the analyses.                                                                                                                                                 | 9        |
|                              | 10b  | Specify type of model, all model-building procedures (including any predictor selection), and method for internal validation.                                                                         | 9        |
|                              | 10d  | Specify all measures used to assess model performance and, if relevant, to compare multiple models.                                                                                                   | 9        |
| Risk groups                  | 11   | Provide details on how risk groups were created, if done.                                                                                                                                             |          |
| <b>Results</b>               |      |                                                                                                                                                                                                       |          |
| Participants                 | 13a  | Describe the flow of participants through the study, including the number of participants with and without the outcome and, if applicable, a summary of the follow-up time. A diagram may be helpful. | 8,9, sm  |
|                              | 13b  | Describe the characteristics of the participants (basic demographics, clinical features, available predictors), including the number of participants with missing data for predictors and outcome.    | 11       |
| Model development            | 14a  | Specify the number of participants and outcome events in each analysis.                                                                                                                               | 11       |
|                              | 14b  | If done, report the unadjusted association between each candidate predictor and outcome.                                                                                                              |          |
| Model specification          | 15a  | Present the full prediction model to allow predictions for individuals (i.e., all regression coefficients, and model intercept or baseline survival at a given time point).                           | SM       |
|                              | 15b  | Explain how to use the prediction model.                                                                                                                                                              | 12 Fig 3 |
| Model performance            | 16   | Report performance measures (with CIs) for the prediction model.                                                                                                                                      | Table 3  |
| <b>Discussion</b>            |      |                                                                                                                                                                                                       |          |
| Limitations                  | 18   | Discuss any limitations of the study (such as nonrepresentative sample, few events per predictor, missing data).                                                                                      | 16       |
| Interpretation               | 19b  | Give an overall interpretation of the results, considering objectives, limitations, and results from similar studies, and other relevant evidence.                                                    | 16       |
| Implications                 | 20   | Discuss the potential clinical use of the model and implications for future research.                                                                                                                 | 15       |
| <b>Other information</b>     |      |                                                                                                                                                                                                       |          |
| Supplementary information    | 21   | Provide information about the availability of supplementary resources, such as study protocol, Web calculator, and data sets.                                                                         | Yes SM   |
| Funding                      | 22   | Give the source of funding and the role of the funders for the present study.                                                                                                                         | 1        |

We recommend using the TRIPOD Checklist in conjunction with the TRIPOD Explanation and Elaboration document.

## References

1. Global strategy for the diagnosis, management, and prevention of Chronic Obstructive Pulmonary Disease (2023 Report). 2022. Available from: <https://goldcopd.org/2023-gold-report-2/>.
2. Wan ES, Castaldi PJ, Cho MH, Hokanson JE, Regan EA, Make BJ, Beaty TH, Han MK, Curtis JL, Curran-Everett D, Lynch DA, DeMeo DL, Crapo JD, Silverman EK. Epidemiology, genetics, and subtyping of preserved ratio impaired spirometry (PRISm) in COPD. *Respiratory research* 2014; 15: 219S-213.
